# Supplementary material for: Streamlined and Abundant Bacterioplankton Thrive in Functional Cohorts
Source: PubMed Central journal article supplement (PMC7527133; doi:10.1128/msystems.00316-20), 2020-09-29
Supplement: mSystems.00316-20-st001.pdf [file mSystems.00316-20-st001.pdf]

|                  | TS    | MC     |
|------------------|-------|--------|
| No. OTUs         | 216   | 100    |
| $n_{\text{eff}}$ | 22    | 3      |
| sparsity         | 49    | 85     |
| phyla assort.    | 0.35  | 0.213  |
| class assort.    | 0.29  | 0.407  |
| order assort.    | 0.29  | 0.409  |
| family assort.   | 0.27  | 0.423  |
| genus assort.    | 0.26  | 0.354  |
| species assort.  | -0.01 | -0.015 |
