# Supplementary material for: Streamlined and Abundant Bacterioplankton Thrive in Functional Cohorts
Source: PubMed Central journal article supplement (PMC7527133; doi:10.1128/msystems.00316-20), 2020-09-29
Supplement: mSystems.00316-20-st002.pdf [file mSystems.00316-20-st002.pdf]

|                      | calculation                      | r     | No. OTUs | p val | Test of:                               |
|----------------------|----------------------------------|-------|----------|-------|----------------------------------------|
| All network OTUs     | log(sum +1) TS vs log(sum +1) MC | -0.25 | 299      | 0.00  | total abundance vs total abundance     |
|                      | log(av +1) TS vs log(av +1) MC   | 0.58  | 299      | 0.00  | average abundance vs average abundance |
|                      | log(av +1) TS vs % of MC         | 0.29  | 299      | 0.00  | average abundance vs prevalence        |
|                      | % TS vs % of MC                  | -0.06 | 299      | 0.27  | prevalence vs prevalence               |
| Nanopelagicales OTUs | log(sum +1) TS vs log(sum +1) MC | 0.11  | 31       | 0.54  | total abundance vs total abundance     |
|                      | log(av +1) TS vs log(av +1) MC   | 0.33  | 31       | 0.07  | average abundance vs average abundance |
|                      | log(av +1) TS vs % of MC         | 0.41  | 31       | 0.02  | average abundance vs prevalence        |
|                      | % TS vs % of MC                  | 0.10  | 31       | 0.61  | prevalence vs prevalence               |
| Ca. Fonsibacter OTUs | log(sum +1) TS vs log(sum +1) MC | 0.32  | 11       | 0.34  | total abundance vs total abundance     |
|                      | log(av +1) TS vs log(av +1) MC   | -0.06 | 11       | 0.87  | average abundance vs average abundance |
|                      | log(av +1) TS vs % of MC         | -0.11 | 11       | 0.76  | average abundance vs prevalence        |
|                      | % TS vs % of MC                  | 0.82  | 11       | 0.00  | prevalence vs prevalence               |
